# Supplementary material for: Willingness to pay for nationwide wastewater surveillance system for infectious diseases in Japan
Source: Royal Society of Chemistry journal article supplement (doi:10.1039/d4ew00332b), 2024-05-30
Supplement: d4ew00332b1.pdf [file d4ew00332b1.pdf]

# Supplementary Information: Willingness to pay for nationwide wastewater surveillance system for infectious diseases in Japan

## 1 Supplementary Calculations and Explanations

### 1.1 Background

#### 1.1.1 Budget of the proposed surveillance system (\$33 million)

We estimated the annual budget to maintain the proposed nationwide wastewater surveillance system for infectious diseases in Japan, following a previous study.<sup>1</sup> Namely, the unit test costs were \$607 and \$1820 to measure (a) the viral density and (b) the proportions of the viral variants, respectively. The former test was assumed to be conducted twice a week for 50 weeks per year. The latter test was assumed to be implemented once a week for 25 weeks per year. Hence, the total annual cost per one site was estimated to be \$0.106 million (= \$607x2x50 + \$1820x1x25). These wastewater tests were assumed to be performed at 286 wastewater treatment plants, covering 51 major cities (at least one major city in each prefecture) and Tokyo prefecture. Thus, the total test cost was approximately \$30.38 million (=286 x \$0.106 million). The additional cost to build and maintain the database system to integrate and publicly release the data was assumed to be \$2.43 million. The grand total was estimated to be around \$33 million per year.

### 1.2 Methods

#### 1.2.1 Survey sampling method and detailed response rates

In our survey, at least one participant was obtained for each of three age categories (20-39, 40-59, > 59) and gender for all 47 prefectures. Based on the actual number of respondents for each prefecture and the response rates at the national level (as summarized in the table below), we calculated the sampling weights for each of 282 cells (3 age categories x 2 gender categories x 47 prefectures) that were used in our regression analyses.

**Table S1.** Survey response rates for age and gender categories

| Age categories | Male    | Female  | Total  |
|----------------|---------|---------|--------|
| 20-39          | 0.05348 | 0.06215 | 0.0572 |
| 40-59          | 0.07505 | 0.06238 | 0.0680 |
| > = 60         | 0.06298 | 0.11779 | 0.0831 |
| Total          | 0.0635  | 0.0790  | 0.0704 |

#### 1.2.2 Comparison of the full sample characteristics with the national data

The table below indicates that the present study's full sample reasonably represent the national population in terms of age, income and education. For instance, compared to the national data, our full sample was slightly younger in mean and older in median. Additionally, the proportions of the age categories were quite comparable to the national sample. The mean and median income of our full sample was slightly higher than the national data. Educational attainment (2-year college or higher) was higher among the full sample than national data. This could be partly because our study participants were required to complete the survey using a computer or mobile device and to understand a slightly complicated elicitation exercise and answering format. Also, this could be partly because the oldest subpopulation (with lower educational attainment) did not participate in our survey. For example, 95 and 99 percentiles in age of our full sample were 75.0 and 82.0 years old, respectively. These values were much lower than the corresponding values of 85.4 and 92.6 among the national data, respectively.

44 **Table S2.** Comparison of the present study's full sample with the national data in terms of age, income, and education

|                                                                       | The present study's full sample (N=2,538) | National data |
|-----------------------------------------------------------------------|-------------------------------------------|---------------|
| Age (Mean and Median) among 20 years and over population <sup>a</sup> |                                           |               |
| Mean                                                                  | 54.1                                      | 54.8          |
| Median                                                                | 56.0                                      | 53.6          |
| 95 percentile                                                         | 75.0                                      | 85.4          |
| 99 percentile                                                         | 82.0                                      | 92.6          |
| The proportions of age categories <sup>b</sup>                        |                                           |               |
| aged 20-39                                                            | 23.4%                                     | 25.0%         |
| aged 40-59                                                            | 33.3%                                     | 33.2%         |
| aged >59                                                              | 43.4%                                     | 41.7%         |
| Household income [million Japanese Yen] <sup>c</sup>                  |                                           |               |
| Mean                                                                  | 5.56                                      | 5.46          |
| Median                                                                | 4.50                                      | 4.23          |
| Educational attainment: 2-year college or higher <sup>d</sup>         |                                           |               |
|                                                                       | 61%                                       | 45.4%         |

45 <sup>a</sup>The most recent national data was as of 2022<sup>2</sup>

46 <sup>b</sup>The most recent national data was as of 2023<sup>3</sup>

47 <sup>c</sup>The most recent national data was as of 2022<sup>4</sup>

48 <sup>d</sup>The most recent national data was as of 2022<sup>5</sup>

49

### 50 **1.3 Results and Discussion**

#### 51 **1.3.1 Association between age and WTP**

52 Caution is needed to interpret the association between age and WTP since a quadratic term of age was also  
53 included in our regression models.

54 Given the regression was expressed below,

$$55 \quad (WTP) = b_0 + b_1 (\text{age}) + b_2 (\text{age}^2) + b_3 (\text{all other covariates}) + (\text{error term}) \quad (1)$$

56

57 Age's incremental effect on WTP was mathematically expressed below by taking a differential of WTP  
58 with respect to age.

$$59 \quad d(WTP)/d(\text{age}) = b_1 + b_2 \times 2 \times (\text{age}) \quad (2)$$

60

61 The values in Table S3 below are calculated based on the estimated coefficients of the pooled regression  
62 for the main population reported in the manuscript's Table 4. That is, the point estimates of  $b_1$  and  $b_2$  in the  
63 equation above were (-)1.1 and 0.012, respectively. Age in this Table S3 ranged from 20 to 93, which was  
64 consistent with the age range among the corresponding main population.

65

66 Columns 3 and 6 of Table S3 indicate the effects of the two age-related variables on WTP. For instance,  
67 when age was 20, the value of column 3 was -17.20 (= (-)1.1 x 20 + 0.012 x (20<sup>2</sup>) in equation (1) above).  
68 In columns 4 and 8 of Table S3, the age's incremental effects on WTP are presented. This incremental  
69 effect, from age 20 to age 21, was (-)\$0.61 (= (age's effect on WTP at age 21) - (age's effect on WTP at  
70 age 20) = (-)\$17.81 - (-)\$17.20; shown in this Table). Thus, a one unit increase in age was associated with  
71 a "decrease" in WTP at age 20, i.e., a negative association between age and WTP.

72

73 However, this association changed to be positive when age was equal to or greater than 47, as shown in the  
74 shaded cell in Table S3. Namely, a one unit increase in age was associated with an increase in WTP by  
75 \$0.02 at the age 47. Moreover, as columns 4 and 8 of Table S3 indicates, the magnitude of this increase in  
76 a WTP was estimated to be greater with the advancement in age. These estimates appear reasonable and  
77 align with the latest CDC clinical guideline stating that "age over 50 years" is the most important risk  
78 factor for severe outcomes of COVID-19, with risk increasing substantially at age  $\geq 65$  years.<sup>6</sup>

79

80

81

82

83

84

85

86

87

88

89

90 **Table S3.** Age's incremental effect on WTP, based on the estimated coefficients of the pooled regression for the main  
 91 population reported in the manuscript's Table 4

| 1   | 2                | 3                                | 4                                            | 5   | 6                | 7                                | 8                                            |
|-----|------------------|----------------------------------|----------------------------------------------|-----|------------------|----------------------------------|----------------------------------------------|
| age | age <sup>2</sup> | age's effect on WTP <sup>a</sup> | age's incremental effect on WTP <sup>b</sup> | age | age <sup>2</sup> | age's effect on WTP <sup>a</sup> | age's incremental effect on WTP <sup>b</sup> |
| 20  | 400              | -\$17.20                         | -                                            | 57  | 3249             | -\$23.71                         | \$0.26                                       |
| 21  | 441              | -\$17.81                         | -\$0.61                                      | 58  | 3364             | -\$23.43                         | \$0.28                                       |
| 22  | 484              | -\$18.39                         | -\$0.58                                      | 59  | 3481             | -\$23.13                         | \$0.30                                       |
| 23  | 529              | -\$18.95                         | -\$0.56                                      | 60  | 3600             | -\$22.80                         | \$0.33                                       |
| 24  | 576              | -\$19.49                         | -\$0.54                                      | 61  | 3721             | -\$22.45                         | \$0.35                                       |
| 25  | 625              | -\$20.00                         | -\$0.51                                      | 62  | 3844             | -\$22.07                         | \$0.38                                       |
| 26  | 676              | -\$20.49                         | -\$0.49                                      | 63  | 3969             | -\$21.67                         | \$0.40                                       |
| 27  | 729              | -\$20.95                         | -\$0.46                                      | 64  | 4096             | -\$21.25                         | \$0.42                                       |
| 28  | 784              | -\$21.39                         | -\$0.44                                      | 65  | 4225             | -\$20.80                         | \$0.45                                       |
| 29  | 841              | -\$21.81                         | -\$0.42                                      | 66  | 4356             | -\$20.33                         | \$0.47                                       |
| 30  | 900              | -\$22.20                         | -\$0.39                                      | 67  | 4489             | -\$19.83                         | \$0.50                                       |
| 31  | 961              | -\$22.57                         | -\$0.37                                      | 68  | 4624             | -\$19.31                         | \$0.52                                       |
| 32  | 1024             | -\$22.91                         | -\$0.34                                      | 69  | 4761             | -\$18.77                         | \$0.54                                       |
| 33  | 1089             | -\$23.23                         | -\$0.32                                      | 70  | 4900             | -\$18.20                         | \$0.57                                       |
| 34  | 1156             | -\$23.53                         | -\$0.30                                      | 71  | 5041             | -\$17.61                         | \$0.59                                       |
| 35  | 1225             | -\$23.80                         | -\$0.27                                      | 72  | 5184             | -\$16.99                         | \$0.62                                       |
| 36  | 1296             | -\$24.05                         | -\$0.25                                      | 73  | 5329             | -\$16.35                         | \$0.64                                       |
| 37  | 1369             | -\$24.27                         | -\$0.22                                      | 74  | 5476             | -\$15.69                         | \$0.66                                       |
| 38  | 1444             | -\$24.47                         | -\$0.20                                      | 75  | 5625             | -\$15.00                         | \$0.69                                       |
| 39  | 1521             | -\$24.65                         | -\$0.18                                      | 76  | 5776             | -\$14.29                         | \$0.71                                       |
| 40  | 1600             | -\$24.80                         | -\$0.15                                      | 77  | 5929             | -\$13.55                         | \$0.74                                       |
| 41  | 1681             | -\$24.93                         | -\$0.13                                      | 78  | 6084             | -\$12.79                         | \$0.76                                       |
| 42  | 1764             | -\$25.03                         | -\$0.10                                      | 79  | 6241             | -\$12.01                         | \$0.78                                       |
| 43  | 1849             | -\$25.11                         | -\$0.08                                      | 80  | 6400             | -\$11.20                         | \$0.81                                       |
| 44  | 1936             | -\$25.17                         | -\$0.06                                      | 81  | 6561             | -\$10.37                         | \$0.83                                       |
| 45  | 2025             | -\$25.20                         | -\$0.03                                      | 82  | 6724             | -\$9.51                          | \$0.86                                       |
| 46  | 2116             | -\$25.21                         | -\$0.01                                      | 83  | 6889             | -\$8.63                          | \$0.88                                       |
| 47  | 2209             | -\$25.19                         | \$0.02                                       | 84  | 7056             | -\$7.73                          | \$0.90                                       |
| 48  | 2304             | -\$25.15                         | \$0.04                                       | 85  | 7225             | -\$6.80                          | \$0.93                                       |
| 49  | 2401             | -\$25.09                         | \$0.06                                       | 86  | 7396             | -\$5.85                          | \$0.95                                       |
| 50  | 2500             | -\$25.00                         | \$0.09                                       | 87  | 7569             | -\$4.87                          | \$0.98                                       |
| 51  | 2601             | -\$24.89                         | \$0.11                                       | 88  | 7744             | -\$3.87                          | \$1.00                                       |
| 52  | 2704             | -\$24.75                         | \$0.14                                       | 89  | 7921             | -\$2.85                          | \$1.02                                       |
| 53  | 2809             | -\$24.59                         | \$0.16                                       | 90  | 8100             | -\$1.80                          | \$1.05                                       |
| 54  | 2916             | -\$24.41                         | \$0.18                                       | 91  | 8281             | -\$0.73                          | \$1.07                                       |
| 55  | 3025             | -\$24.20                         | \$0.21                                       | 92  | 8464             | \$0.37                           | \$1.10                                       |
| 56  | 3136             | -\$23.97                         | \$0.23                                       | 93  | 8649             | \$1.49                           | \$1.12                                       |

92 <sup>a</sup>The calculation method:  $(-1.1 \times (\text{age}) + 0.012 \times (\text{age}^2))$ , also expressed as the equation (1) above where the estimated  
 93 coefficients are based on the pooled regression for the main population reported in the manuscript's Table 4.

94 <sup>b</sup>The calculation method: The change in the value in column (3), e.g., age's incremental effect from age 20 to age 21 =  $(-)\$0.61$   
 95 = (age's effect on WTP at age 21) - (age's effect on WTP at age 20) =  $(-)\$17.81 - (-)\$17.20$

96  
 97

### 98 **1.3.2 Budget for the wastewater surveillance at airports (\$0.5 million)**

99 We estimated the additional annual cost (\$0.5 million) to expand the wastewater surveillance to  
 100 four major international airports as follows. The annual cost per international airport followed the per-site  
 101 cost of \$0.106 million in Supplementary Information 1.1.1 above. We assumed one sampling site for each  
 102 of four major airports in Japan, i.e., Tokyo, Narita, Kansai, and Chubu airports. Therefore, the total annual  
 103 test cost was \$0.424 million. To expand the nationwide database system to further include the data from  
 104 airports was estimated to be around \$0.07 million. Altogether, the total annual cost was estimated to be  
 105 \$0.5 million.

106 **2 Survey questionnaire** (modified questions in the study by Himmler *et al.*<sup>7)</sup>

107

108 **2.1 Introduction to the survey**

109 For all local and prefecture governments, increasing the health safety of the residents is an important policy goal. Recent infectious outbreaks  
110 of the new coronavirus infectious disease (COVID-19), influenza, and other infectious diseases indicate that this policy goal cannot  
111 necessarily be achieved by a single local or prefecture government.

112

113 Conventional epidemiology information on infectious diseases is obtained by collecting the results of clinical antigen tests and clinical PCR  
114 tests for individual humans, which are aggregated at a regional level.

115

116 Triggered by the global epidemic of COVID-19, a new survey method called "wastewater surveillance " has been implemented at a large  
117 scale around the world. This new survey method can test and monitor the virus in wastewater, utilizing the shedding of viral RNA in feces and  
118 saliva by people infected with the new corona (SARS-CoV-2) virus or influenza virus, regardless of whether they are symptomatic or not.

119

120 Compared to conventional epidemiological surveys based on clinical antigen and PCR tests on individual humans, wastewater surveillance  
121 has three major advantages.

122

123 The first advantage is that wastewater surveillance can detect outbreaks of infectious diseases about a week earlier than conventional  
124 epidemiological surveys. As a result, medical institutions will have more time to secure sufficient medical resources such as (i) inpatient and  
125 ICU beds, (ii) ventilators, and (iii) medical staff.

126

127 The second advantage is that the results of wastewater surveillance are more representative than those of conventional epidemiological  
128 surveys. Conventional epidemiological surveys tend to underestimate an infection level when supply of clinical tests is limited or when many  
129 people avoid clinical tests. Even if you don't seek clinical antigen/PCR tests, you always use a restroom - so that wastewater surveillance can  
130 more accurately detect an infection level of an entire area.

131

132 The third advantage is that wastewater surveillance is less expensive and more cost-effective than conventional epidemiological surveys. For  
133 example, when a wastewater treatment plant covers 100,000 people, an objective indicator (e.g. increase or decrease in the number of  
134 infected people) that reflects the infection level of the entire area where these 100,000 people live will be obtained from wastewater  
135 surveillance (approximately 50,000 yen per test). In order to obtain the same indicator in conventional epidemiological surveys, clinical  
136 antigen/PCR tests need to be conducted among 100,000 people (assuming the cost per person is 2,000 yen, 200 million yen per 100,000  
137 people).

138

139 In Japan, governments of [Sapporo City \[Link 1\]](#) and [Kanagawa Prefecture \[Link 2\]](#) have already been continuously conducting wastewater  
140 surveillance at wastewater treatment plants, monitoring SARS-CoV-2 and seasonal influenza viruses, and releasing the results to the public.  
141 However, at the national level, a very limited number of local governments conduct wastewater surveillance separately without any  
142 nationwide integrated system.

143

144 On the other hand, wastewater surveillance at treatment plants has been conducted at more than 1200 sites in the [United States \[Link 3\]](#).  
145 Under the US nationwide integrated system, survey results are published and updated regularly. In the [European Union \(EU\) \[Link 4\]](#) member  
146 states, wastewater surveillance at treatment plants has been conducted at more than 1300 sites.

147

148 *Note: In the paragraph above, clicking the underlined part will link to the URL below.*

149 [Link 1] ( NOTE: Click to <https://www.city.sapporo.jp/gesui/surveillance.html> )

150 [Link 2] ( NOTE: Click to <https://www.pref.kanagawa.jp/docs/ga4/covid19/simulation.html> )

151 [Link 3] ( NOTE: Click to <https://covid.cdc.gov/covid-data-tracker/#wastewater-surveillance> )

152 [Link 4] ( NOTE: Click to [https://environment.ec.europa.eu/news/coronavirus-response-monitoring-wastewater-contributes-tracking-](https://environment.ec.europa.eu/news/coronavirus-response-monitoring-wastewater-contributes-tracking-coronavirus-and-variants-across-all-2022-03-17_en)  
153 [coronavirus-and-variants-across-all-2022-03-17\\_en](https://environment.ec.europa.eu/news/coronavirus-response-monitoring-wastewater-contributes-tracking-coronavirus-and-variants-across-all-2022-03-17_en) )

154

155 If such a nationwide integrated warning system based on wastewater surveillance is newly established in Japan, this system will enable us to  
156 respond more quickly to COVID-19 and other infectious diseases and help [contain \[Link 5\]](#) and [mitigate \[Link 6\]](#) outbreaks. Thus, this new  
157 nationwide wastewater surveillance system would help improve the health safety of residents.

158 This survey will ask how you would value the establishment and maintenance of this system.

159

160 *Note: In the paragraph above, clicking the underlined part will link to a pop-up window including a definition below.*

161 [Link 5] contain: control or restrain

162 [Link 6] mitigate: make something less severe or reduce its effects

163

164 Newly establishing this nationwide warning system has the three additional advantages explained hereafter:

165 The first additional advantage is that it notifies the warning level (high, medium, or low) of an ongoing epidemic based on wastewater  
166 surveillance results, which will be a useful criterion when you decide to (a) go out, (b) seek clinical antigen/PCR tests, and (c) seek an  
167 additional vaccination.

168

169 The second additional advantage is that it helps predict the longer term (more than a week) future epidemic level in your residential  
170 prefecture, using epidemic information based on wastewater surveillance from neighboring prefectures under the nationwide system.

171

172 The third additional advantage is that surveillance information demonstrating a low-level epidemic in your area would encourage people from  
173 outside your area to visit your area for the purpose of sightseeing, business, or returning home.

174

175 This survey consists of three parts and takes approximately 15 to 20 minutes to complete. Your responses will be collected anonymously by  
176 the research team. The survey results will be used for scientific research reports and policy implications. Participation in this survey is  
177 voluntary, and you are free to drop out of this survey at any time. If you drop out during the survey, all information provided up to that point  
178 will be discarded. There are no right or wrong answers in this survey. Therefore, your honest opinions are appreciated.

179

180

181 Please check the box below if you agree to participate in this survey and provide your anonymous answers for scientific research purposes.

182

## 183 **2.2 Questions for awareness of outbreaks**

184 [General interest]

185 ▪ Whenever there is news about an emerging infectious outbreak, I follow it closely.

186

187 [General concern]

188 ▪ I am more concerned about the risk of infectious outbreaks than about the risk of developing other diseases.

189 ▪ Infectious outbreaks are a major public health concern.

190 ▪ In case of an infectious outbreak in my prefecture, much harm will be caused to affected people.

191

192 [Severity of risk]

193 ▪ I think there is a high risk of an infectious outbreak in my prefecture in the coming year.

194

195 [Susceptibility to risk]

196 ▪ Compared to those around me, I feel more at risk of being affected by an infectious outbreak.

197

198 [Handling risk]

199 ▪ In case of an emerging infectious disease in my prefecture, I would take all precautionary measures advised by the authorities.

200

201 [Protection from risk]

202 ▪ In my prefecture, I generally feel protected against infectious outbreaks.

203

204 [Prevention of risk]

205 ▪ By taking appropriate precautionary measures, the risk of infectious outbreaks can be lowered substantially.

206

207 [Origin of risk]

208 ▪ Infectious outbreaks usually originate in other prefectures or countries; it is their responsibility to deal with them.

209

210 [Scope of risk]

211 ▪ Infectious outbreaks do not only cause human suffering but also economic damage.

212 ▪ Infectious outbreaks can affect everyone and, therefore, can be very disruptive for social life.

213

### 214 **2.3 Two-stage willingness-to-pay approach**

215 Currently, there is no nationwide warning system based on wastewater surveillance [Link 7] in order to help contain [Link 8] and mitigate [Link 9] COVID-19, influenza, and other infectious diseases. For example, ongoing fragmented warning systems in Japan focus on a specific type of disease or are operated by a single local or prefecture government.

218

219 *Note: In the paragraph above, clicking the underlined part will link to a pop-up window including a more detailed explanation or definition below.*

221 [Link 7] wastewater surveillance:

222 Compared to conventional epidemiological surveys based on antigen and PCR tests on individual humans, wastewater surveillance has three major advantages.

224

- The first advantage is that wastewater surveillance can detect outbreaks of infectious diseases about a week earlier than conventional epidemiological surveys. As a result, medical institutions will have more time to secure sufficient medical resources such as (i) inpatient and ICU beds, (ii) ventilators, and (iii) medical staff.

226

- The second advantage is that the results of wastewater surveillance are more representative than those of conventional epidemiological surveys. Conventional epidemiological surveys tend to underestimate an infection level when supply of clinical tests is limited or when many people avoid clinical tests. Even if you don't seek clinical antigen/PCR tests, you always use a restroom - so that wastewater surveillance can more accurately detect an infection level of an entire area.

228

229

230

231

- The third advantage is that wastewater surveillance is less expensive and more cost-effective than conventional epidemiological surveys. For example, when a wastewater treatment plant covers 100,000 people, an objective indicator (e.g. increase or decrease in the number of infected people) that reflects the infection level of the entire area where these 100,000 people live will be obtained from wastewater surveillance (approximately 50,000 yen per test). In order to obtain the same indicator in conventional epidemiological surveys, clinical antigen/PCR tests need to be conducted among 100,000 people (assuming the cost per person is 2,000 yen, 200 million yen per 100,000 people).

233

234

235

236

237

[Link 8] contain: control or restrain

238

[Link 9] mitigate: make something less severe or reduce its effects

239

240

If “the nationwide integrated warning system based on wastewater surveillance (“the warning system” hereafter)” [Link 10] is newly

241

established in Japan, the proposed system will integrate information collected from all prefectures and, hence, enable us to respond more

242 efficiently to infectious diseases due to viruses and bacteria. Moreover, this warning system is expected to help prevent damage (due to  
243 viruses and bacteria) to residents' health in every prefecture.

244

245 *Note: In the paragraph above, clicking the underlined part will link to a pop-up window including a more detailed explanation or definition*  
246 *below.*

247 [Link 10] nationwide integrated warning system based on wastewater surveillance ("the warning system"):

248 Newly establishing this nationwide warning system has three additional advantages explained hereafter:

- 249 ● The first additional advantage is that it notifies the warning level (high, medium, or low) of an ongoing epidemic based on  
250 wastewater surveillance results, which will be a useful criterion when you decide to (a) go out, (b) seek clinical antigen/PCR  
251 tests, and (c) seek an additional vaccination.
- 252 ● The second additional advantage is that it helps predict the longer term (more than a week) future epidemic level in your  
253 residential prefecture, using epidemic information based on wastewater surveillance from neighboring prefectures under the  
254 nationwide system.
- 255 ● The third additional advantage is that surveillance information regarding a low-level epidemic in your area would encourage  
256 people from outside your area to visit your area for the purpose of sightseeing, business, or returning home.

257

258 Establishing and maintaining this warning system is not feasible without costs.

259 Thus, suppose that this warning system would be funded by taxation through a regular yearly installment, paid by all adults in your prefecture  
260 (over 20 years of age).

261

262 *Note: Scenario description common to all three scenarios.*

263 Suppose all residents in Japan face a 10% risk per year of becoming sick due to a viral infection. The risks, after you become infected and  
264 sick, include, on average, a 90% chance of being isolated for 10 days, a 9% chance of a hospital admission, and a 1% chance of death.

265 These risks of hospitalizations and deaths are higher among older individuals and individuals with certain chronic diseases.

266

267 *Note: Scenario description unique to Scenario 1.*

268 Also, suppose that the infection risks due to SARS-CoV-2 and influenza viruses for you and people around you can be reduced from 10% to  
269 8% through the proposed new nationwide integrated warning system based on wastewater surveillance.

270

271 WTP question - lower interval:

272 Suppose all adults in your prefecture, including you, would have to pay this annual installment tax starting now. Please consider the amounts  
273 on the scale below, ordered from low to high, and select the amount that you would definitely be willing to pay per year for establishing this  
274 integrated warning system. Please keep in mind your ability to pay (your net yearly household income) and think of other insurance premiums  
275 (e.g., health insurance, life insurance, auto insurance, home/liability insurance) you currently pay. For your reference, \$0.22 covers the



276 Japanese government's current system to monitor earthquake/tsunami (not including the earthquake mediating infrastructure cost, just the  
277 monitoring system), and \$55 covers one dose of COVID-19 vaccination which was financed by the Japanese government.

278

|     |        |        |        |        |       |       |       |       |      |      |      |      |       |       |       |                 |
|-----|--------|--------|--------|--------|-------|-------|-------|-------|------|------|------|------|-------|-------|-------|-----------------|
| \$0 | \$0.11 | \$0.22 | \$0.33 | \$0.55 | \$1.1 | \$2.2 | \$3.3 | \$5.5 | \$11 | \$22 | \$33 | \$55 | \$110 | \$165 | \$220 | More than \$220 |
|-----|--------|--------|--------|--------|-------|-------|-------|-------|------|------|------|------|-------|-------|-------|-----------------|

279

280 *NOTE: If "More than \$220" is chosen by a respondent, the follow-up question below will pop-up.*

281 You have indicated that the maximum amount you would be willing to pay for the warning system is more than \$200.

282 Please indicate exactly how much you are willing to pay, specifying the value that is more than \$200 in the box below.

283

284 WTP question - upper interval:

285 Now consider the same amounts below, from low to high, and select the amount that you would definitely not be willing to pay per year for  
286 establishing this warning system. This amount would be a taxation paid by all adults in your prefecture. Please keep in mind your ability to  
287 pay (your net yearly household income) and think of other insurance premiums (e.g., health insurance, life insurance, auto insurance,  
288 home/liability insurance) you currently pay. For your reference, \$0.22 covers the Japanese government's current system to monitor  
289 earthquake/tsunami (not including the earthquake mediating infrastructure cost, just the monitoring system), and \$55 covers one dose of  
290 COVID-19 vaccination which was financed by the Japanese government.

291

|     |        |        |        |        |       |       |       |       |      |      |      |      |       |       |       |                 |
|-----|--------|--------|--------|--------|-------|-------|-------|-------|------|------|------|------|-------|-------|-------|-----------------|
| \$0 | \$0.11 | \$0.22 | \$0.33 | \$0.55 | \$1.1 | \$2.2 | \$3.3 | \$5.5 | \$11 | \$22 | \$33 | \$55 | \$110 | \$165 | \$220 | More than \$220 |
|-----|--------|--------|--------|--------|-------|-------|-------|-------|------|------|------|------|-------|-------|-------|-----------------|

292

293 *NOTE: If "More than \$220" is chosen by a respondent, the follow-up question below will pop-up.*

294 You have indicated that the maximum amount you would be willing to pay for the warning system is more than \$200.

295 Please indicate exactly how much you are willing to pay, specifying the value that is more than \$200 in the box below.

296

297 WTP question - open-ended question:

298 You have indicated that you would definitely pay \$11 (*NOTE: Example of the value chosen by the respondent earlier*) and that you would  
299 definitely not pay \$22 (*NOTE: Example of the value chosen by the respondent earlier*) for the new system. Please indicate in the box below  
300 the amount between \$11 and \$22 that is closest to the maximum that you would be willing to pay per year. This amount would be a taxation  
301 paid by all adults in your prefecture. Please keep in mind your ability to pay (your net yearly household income) and think of other insurance  
302 premiums (e.g., health insurance, life insurance, auto insurance, home/liability insurance) you currently pay.

303

304

305 *NOTE: If "\$0" is chosen by a respondent, the follow-up question below will pop-up.*

306 WTP question - Zero WTP:

307 You have indicated that the maximum amount you would be willing to pay to establish and maintain the warning system is \$0.

308 Please indicate the reason for your response among the options below.

- 309 (1) The nationwide integrated warning system is not worth more than \$0 to me.
- 310 (2) I am unable to pay more than \$0.
- 311 (3) The current government budget should be reallocated to cover this system.
- 312 (4) Other reason (please specify)

313 **3 Supplementary Tables**

314

315 **Table S4.** Descriptive statistics among three populations

|                                                                              | Full sample<br>(N=2,538) | Main<br>Population <sup>a</sup><br>(N= 2,457) | Secondary<br>Population <sup>b</sup><br>(N= 1,870) | Comparison of variables among two<br>populations |                                            |                                     |
|------------------------------------------------------------------------------|--------------------------|-----------------------------------------------|----------------------------------------------------|--------------------------------------------------|--------------------------------------------|-------------------------------------|
|                                                                              | Mean (SD)                | Mean (SD)                                     | Mean (SD)                                          | Full sample<br>vs. Main<br>population            | Full sample vs.<br>Secondary<br>population | Main vs.<br>Secondary<br>population |
| Annual household income<br>[1000 US Dollars]                                 | 61.32 (44.01)            | 61.63 (44.24)                                 | 61.53 (44.13)                                      | ***                                              |                                            |                                     |
| Age                                                                          | 54.07 (14.92)            | 54.15 (14.97)                                 | 54.27 (14.63)                                      |                                                  |                                            |                                     |
| Female <sup>c</sup>                                                          | 0.50 (0.50)              | 0.51 (0.50)                                   | 0.51 (0.50)                                        |                                                  |                                            |                                     |
| 2-year college or higher<br>educational attainment <sup>c</sup>              | 0.61 (0.49)              | 0.61 (0.49)                                   | 0.61 (0.49)                                        |                                                  |                                            |                                     |
| Married <sup>c</sup>                                                         | 0.59 (0.49)              | 0.59 (0.49)                                   | 0.59 (0.49)                                        |                                                  |                                            |                                     |
| Employed, excluding self-<br>employed <sup>c</sup>                           | 0.60 (0.49)              | 0.60 (0.49)                                   | 0.59 (0.49)                                        |                                                  |                                            |                                     |
| Self-employed <sup>c</sup>                                                   | 0.09 (0.28)              | 0.09 (0.28)                                   | 0.10 (0.30)                                        |                                                  | **                                         | **                                  |
| Not employed <sup>c</sup>                                                    | 0.40 (0.49)              | 0.40 (0.49)                                   | 0.41 (0.49)                                        |                                                  |                                            |                                     |
| Health status <sup>c,d</sup>                                                 | 0.16 (0.37)              | 0.16 (0.37)                                   | 0.17 (0.37)                                        | ***                                              |                                            | ***                                 |
| Awareness of outbreaks <sup>e</sup>                                          | 43.02 (6.09)             | 43.05 (6.06)                                  | 43.08 (5.93)                                       |                                                  |                                            |                                     |
| No COVID-19 infection<br>experience for oneself or<br>family <sup>c</sup>    | 0.68 (0.47)              | 0.68 (0.47)                                   | 0.69 (0.46)                                        |                                                  | **                                         | **                                  |
| COVID-19 infection<br>experience for oneself <sup>c</sup>                    | 0.06 (0.23)              | 0.06 (0.23)                                   | 0.05 (0.22)                                        |                                                  | ***                                        | ***                                 |
| COVID-19 infection<br>experience both for oneself<br>and family <sup>c</sup> | 0.17 (0.37)              | 0.17 (0.37)                                   | 0.16 (0.36)                                        |                                                  | **                                         | **                                  |
| Ever smoking status <sup>c</sup>                                             | 0.35 (0.48)              | 0.35 (0.48)                                   | 0.34 (0.48)                                        | **                                               | *                                          |                                     |
| Mortality rate of COVID-19<br>[per million in a resident<br>prefecture]      | 580 (160)                | 578 (159)                                     | 578 (158)                                          | **                                               |                                            |                                     |
| WTP order <sup>f</sup>                                                       | 0.51 (0.50)              | 0.51 (0.50)                                   | 0.51 (0.50)                                        |                                                  |                                            |                                     |

316 SD, standard deviation.

317 <sup>a</sup>Main population excluded outliers (defined as WTP exceeding 5% of annual income (N = 1)) and all individuals with at least one protest zero  
318 in any of 3 scenarios (protest zeros) from the full sample.

319 <sup>b</sup>Secondary population further excluded those who responded with at least one pair of “irrational WTP magnitude order” from the main  
320 population. “Irrational WTP magnitude order” was defined as either “WTP for scenario 1 > WTP for scenario 2,” “WTP for scenario 1 > WTP  
321 for scenario 3,” or “WTP for scenario 2 > WTP for scenario 3.” Three scenarios varied in terms of the effectiveness of the proposed  
322 surveillance system: Mortality will decline from 10% to 8%, 5%, and 2% under Scenario 1, 2, and 3, respectively.

323 <sup>c</sup>Dichotomous variable.

324 <sup>d</sup>Best or second-best level of subjective general health status among 5 levels

325 <sup>e</sup>Awareness of outbreaks, scored from 12 to 60, 12 questions with 5 levels

326 <sup>f</sup>WTP order: 1 if WTP values presented from high-to-low in a survey; 0 if WTP values presented from low-to-high in a survey.

327

328

329

**Table S5.** Lower and upper intervals of the first stage of the WTP exercise [US dollars]

| Category <sup>□</sup>                             | Mean (SD)     | Median | N     |
|---------------------------------------------------|---------------|--------|-------|
| Full sample: Lower interval <sup>a</sup>          | 9.61 (18.76)  | 2.24   | 7,614 |
| Full sample: Upper interval <sup>b</sup>          | 25.25 (35.73) | 7.47   | 7,614 |
| Main Population: Lower interval <sup>a</sup>      | 9.85 (18.76)  | 3.74   | 7,371 |
| Main Population: Upper interval <sup>b</sup>      | 26.00 (35.91) | 7.47   | 7,371 |
| Secondary population: Lower interval <sup>a</sup> | 9.52 (18.26)  | 3.74   | 5,610 |
| Secondary population: Upper interval <sup>b</sup> | 25.00 (35.00) | 7.47   | 5,610 |

330 WTP, willingness to pay; SD, standard deviation.

331 <sup>a</sup>Lower interval: “definitely be willing to pay”

332 <sup>b</sup>Upper interval: “definitely not willing to pay”

333 **Table S6.** WTP per year in US dollars for 3 sample populations with different orders of WTP values in questionnaire

| Category                 | Mean (SD)     | Median | Min  | Max  | N     |
|--------------------------|---------------|--------|------|------|-------|
| Full sample              | 22.95 (44.41) | 7.72   | 0.00 | 1104 | 7,614 |
| -order: from high-to-low | 28.72 (53.97) | 11.04  | 0.00 | 1104 | 3,855 |
| -order: from low-to-high | 19.82 (39.16) | 5.52   | 0.00 | 552  | 3,759 |
| Main Population          | 23.47 (44.29) | 8.83   | 0.00 | 1104 | 7,371 |
| -order: from high-to-low | 29.62 (54.51) | 11.04  | 0.00 | 1104 | 3,729 |
| -order: from low-to-high | 20.12 (37.95) | 5.52   | 0.00 | 497  | 3,642 |
| Secondary population     | 20.48 (42.11) | 6.62   | 0.00 | 1104 | 5,610 |
| -order: from high-to-low | 28.76 (56.66) | 11.04  | 0.00 | 1104 | 2,838 |
| -order: from low-to-high | 19.47 (37.99) | 5.52   | 0.00 | 497  | 2,772 |

334 WTP, willingness to pay; SD, standard deviation.

335  
336 **Table S7.** "Warm up" exercise of WTP for an umbrella [US dollars]

| Category                 | Mean (SD)     | Median | Min  | Max  | N     |
|--------------------------|---------------|--------|------|------|-------|
| Full sample              | 21.84 (47.24) | 11.04  | 0.00 | 1324 | 7,614 |
| -order: from high-to-low | 25.70 (55.31) | 13.24  |      |      | 3,855 |
| -order: from low-to-high | 17.89 (36.78) | 8.83   |      |      | 3,759 |
| Main Population          | 22.19 (47.89) | 11.04  | 0.00 | 1324 | 7,371 |
| -order: from high-to-low | 26.14 (56.13) | 13.24  |      |      | 3,729 |
| -order: from low-to-high | 18.14 (37.19) | 9.82   |      |      | 3,642 |
| Secondary population     | 20.06 (44.14) | 11.04  | 0.00 | 1324 | 5,610 |
| -order: from high-to-low | 23.16 (52.84) | 11.04  |      |      | 2,838 |
| -order: from low-to-high | 16.89 (32.62) | 8.83   |      |      | 2,772 |

337 WTP, willingness to pay; SD, standard deviation.

338  
339 **Table S8.** Pooled regressions on WTP for three populations

| Category                                                          | Full sample      |         | Main population <sup>a</sup> |         | Secondary population <sup>b</sup> |         |
|-------------------------------------------------------------------|------------------|---------|------------------------------|---------|-----------------------------------|---------|
|                                                                   | Coefficient (SD) | p value | Coefficient (SD)             | p value | Coefficient (SD)                  | p value |
| Log income                                                        | 14.36 (2.83)     | ***     | 15.44 (2.81)                 | ***     | 17.28 (3.38)                      | ***     |
| Age                                                               | -1.07 (0.41)     | ***     | -1.10 (0.41)                 | ***     | -1.13 (0.51)                      | **      |
| Age-squared                                                       | 0.012 (0.004)    | ***     | 0.012 (0.004)                | ***     | 0.013 (0.005)                     | ***     |
| Female                                                            | -4.05 (2.12)     | *       | -3.96 (2.13)                 | *       | -2.38 (2.47)                      |         |
| Education 2 yr college or higher                                  | 3.58 (1.66)      | **      | 3.81 (1.69)                  | **      | 4.15 (1.93)                       | **      |
| Married                                                           | -0.91 (2.03)     |         | -0.63 (2.08)                 |         | -1.77 (2.48)                      |         |
| Sel-employed                                                      | -3.57 (2.78)     |         | -3.48 (2.85)                 |         | -2.91 (3.15)                      |         |
| Not-employed                                                      | -2.69 (2.00)     |         | -2.90 (2.00)                 |         | -2.74 (2.34)                      |         |
| Health status <sup>c</sup>                                        | 3.85 (3.89)      |         | 3.68 (4.06)                  |         | 6.10 (4.92)                       |         |
| Awareness 2nd quart. <sup>d</sup>                                 | -1.19 (2.57)     |         | -1.59 (2.72)                 |         | -1.35 (3.33)                      |         |
| Awareness 3rd quart. <sup>d</sup>                                 | 8.01 (3.00)      | ***     | 7.67 (3.15)                  | **      | 8.58 (3.78)                       | **      |
| Awareness 4th quart. <sup>d</sup>                                 | 13.60 (3.16)     | ***     | 12.85 (3.22)                 | ***     | 12.49 (3.95)                      | ***     |
| No COVID-19 infection experience                                  | -2.21 (2.03)     |         | -2.30 (2.08)                 |         | -1.22 (2.49)                      |         |
| Mortality rate of COVID-19 [per million in a resident prefecture] | 0.004 (0.009)    |         | 0.003 (0.009)                |         | 0.005 (0.011)                     |         |
| Smoke ever                                                        | 0.13 (2.34)      |         | 0.03 (2.39)                  |         | -1.37 (2.88)                      | ***     |
| Scenario 1 <sup>e</sup>                                           | -0.99 (0.37)     | ***     | -1.14 (0.36)                 | ***     | -3.47 (0.30)                      | ***     |
| Scenario 3 <sup>e</sup>                                           | 2.13 (0.42)      | ***     | 2.12 (0.43)                  | ***     | 4.076 (0.468)                     | ***     |
| WTP order <sup>f</sup>                                            | 8.24 (1.75)      | ***     | 8.78 (1.78)                  | ***     | 8.56 (2.13)                       | ***     |
| Constant                                                          | -31.22 (19.4)    |         | -34.92 (20.1)                | *       | -47.19 (25.2)                     | *       |
| Observations                                                      | 7,614            |         | 7,371                        |         | 5,610                             |         |
| R-squared                                                         | 0.0517           |         | 0.0549                       |         | 0.0569                            |         |
| Root MSE                                                          | 46.31            |         | 46.09                        |         | 47.37                             |         |

340 WTP, willingness to pay; SD, standard deviation.

341 <sup>a</sup>Main population excluded outliers (defined as WTP exceeding 5% of annual income (N = 1)) and all individuals with at least one protest zero  
342 in any of 3 scenarios (protest zeros) from the full sample.

343 <sup>b</sup>Secondary population further excluded those who responded with at least one pair of "irrational WTP magnitude order" from the main  
344 population. "Irrational WTP magnitude order" was defined as either "WTP for scenario 1 > WTP for scenario 2," "WTP for scenario 1 > WTP  
345 for scenario 3," or "WTP for scenario 2 > WTP for scenario 3." Three scenarios varied in terms of the effectiveness of the proposed  
346 surveillance system: Mortality will decline from 10% to 8%, 5%, and 2% under Scenario 1, 2, (reference category in this regression) and 3,  
347 respectively.

348 \*\*\*: p < .01; \*\*: p < .05; \*: p < .1

349 <sup>c</sup>Best or second-best level of subjective general health status among 5 levels

350 <sup>d</sup>Awareness 2nd/3rd/4th quart.: 2nd, 3<sup>rd</sup>, and 4th quartile of the awareness of outbreaks, scored from 12 to 60 based on 12 questions with 5  
351 levels.

352 <sup>e</sup>The three scenarios varied in terms of the effectiveness of the proposed surveillance system: Mortality will decline from 10% to 8%, 5%, and  
353 2% under Scenario 1, 2 (reference category in this regression), and 3, respectively.

354 <sup>f</sup>WTP order: 1 if WTP values presented from high-to-low in a survey; 0 if WTP values presented from low-to-high in a survey.

355 **References**

356

- 357 1. B. K. Yoo, R. Iwamoto, U. Chung, T. Sasaki and M. Kitajima, Economic Evaluation of City-level  
358 Warning Systems Based on Surveillance at Wastewater Treatment Plants to Recommend Optimal  
359 Clinical COVID-19 Screening Tests at Facilities, Japan, in peer review.
- 360 2. Statistics of Japan, Population by Age (Single Years), Sex and Sex ratio - Total population,  
361 Japanese population, October 1, 2022 [in Japanese], [https://www.e-stat.go.jp/stat-](https://www.e-stat.go.jp/stat-search/files?page=1&layout=datalist&toukei=00200524&tstat=000000090001&cycle=7&year=20220&month=0&tclass1=000001011679&tclass2val=0)  
362 [search/files?page=1&layout=datalist&toukei=00200524&tstat=000000090001&cycle=7&year=2022](https://www.e-stat.go.jp/stat-search/files?page=1&layout=datalist&toukei=00200524&tstat=000000090001&cycle=7&year=20220&month=0&tclass1=000001011679&tclass2val=0)  
363 [0&month=0&tclass1=000001011679&tclass2val=0](https://www.e-stat.go.jp/stat-search/files?page=1&layout=datalist&toukei=00200524&tstat=000000090001&cycle=7&year=20220&month=0&tclass1=000001011679&tclass2val=0), (accessed January 17, 2024).
- 364 3. Statistics of Japan, Population Estimates by Age (Five-Year Groups) and Sex - July 1, 2023 (Final  
365 estimates), December 1, 2023(Provisional estimates), [https://www.e-stat.go.jp/en/stat-](https://www.e-stat.go.jp/en/stat-search/files?page=1&layout=datalist&toukei=00200524&tstat=000000090001&cycle=1&year=20230&month=24101212&tclass1=000001011678&tclass2val=0)  
366 [search/files?page=1&layout=datalist&toukei=00200524&tstat=000000090001&cycle=1&year=2023](https://www.e-stat.go.jp/en/stat-search/files?page=1&layout=datalist&toukei=00200524&tstat=000000090001&cycle=1&year=20230&month=24101212&tclass1=000001011678&tclass2val=0)  
367 [0&month=24101212&tclass1=000001011678&tclass2val=0](https://www.e-stat.go.jp/en/stat-search/files?page=1&layout=datalist&toukei=00200524&tstat=000000090001&cycle=1&year=20230&month=24101212&tclass1=000001011678&tclass2val=0), (accessed December 30, 2023).
- 368 4. Ministry of Health, Labour and Welfare and Japan, Comprehensive Survey of Living Conditions:  
369 Overview on the 2022 survey results [in Japanese], [https://www.mhlw.go.jp/toukei/saikin/hw/k-](https://www.mhlw.go.jp/toukei/saikin/hw/k-tyosa/k-tyosa22/index.html)  
370 [tyosa/k-tyosa22/index.html](https://www.mhlw.go.jp/toukei/saikin/hw/k-tyosa/k-tyosa22/index.html), (accessed 4 January, 2024).
- 371 5. Ministry of Internal Affairs and Communications, Employment status survey 2022 [in Japanese],  
372 [https://www.e-stat.go.jp/stat-](https://www.e-stat.go.jp/stat-search/files?page=1&layout=datalist&toukei=00200532&tstat=000001163626&cycle=0&tclass1=00001163627&tclass2=000001163628&tclass3val=0)  
373 [search/files?page=1&layout=datalist&toukei=00200532&tstat=000001163626&cycle=0&tclass1=00](https://www.e-stat.go.jp/stat-search/files?page=1&layout=datalist&toukei=00200532&tstat=000001163626&cycle=0&tclass1=00001163627&tclass2=000001163628&tclass3val=0)  
374 [0001163627&tclass2=000001163628&tclass3val=0](https://www.e-stat.go.jp/stat-search/files?page=1&layout=datalist&toukei=00200532&tstat=000001163626&cycle=0&tclass1=00001163627&tclass2=000001163628&tclass3val=0), (accessed January 4, 2024).
- 375 6. Centers for Disease Control and Prevention (CDC), Interim Clinical Considerations for COVID-19  
376 Treatment and Pre-exposure Prophylaxis in Outpatients, [https://www.cdc.gov/coronavirus/2019-](https://www.cdc.gov/coronavirus/2019-ncov/hcp/clinical-care/outpatient-treatment-overview.html)  
377 [ncov/hcp/clinical-care/outpatient-treatment-overview.html](https://www.cdc.gov/coronavirus/2019-ncov/hcp/clinical-care/outpatient-treatment-overview.html), (accessed May 19, 2024).
- 378 7. S. Himmler, J. van Exel, M. Perry-Duxbury and W. Brouwer, Willingness to pay for an early warning  
379 system for infectious diseases, *Eur J Health Econ*, 2020, **21**, 763-773.

380
